1 **Canada's human footprint reveals large intact areas juxtaposed against areas under**  
2 **immense anthropogenic pressure**

3 **Authors:** Kristen Hirsh-Pearson<sup>1\*</sup>, Chris J. Johnson<sup>1</sup>, Richard Schuster<sup>1,2</sup>, Roger D. Wheate<sup>1</sup>,  
4 Oscar Venter<sup>1</sup>

5 [K.Hirsh.Pearson@gmail.com](mailto:K.Hirsh.Pearson@gmail.com), [Chris.Johnson@unbc.ca](mailto:Chris.Johnson@unbc.ca), [Richard.Schuster@glcl.carleton.ca](mailto:Richard.Schuster@glcl.carleton.ca),  
6 [Roger.Wheate@unbc.ca](mailto:Roger.Wheate@unbc.ca), [Oscar.Venter@unbc.ca](mailto:Oscar.Venter@unbc.ca)

7 **Affiliations:**

8 <sup>1</sup>Natural Resource and Environmental Studies Institute, University of Northern British Columbia,  
9 3333 University Way, Prince George, BC, Canada, V2N 4Z9

10 <sup>2</sup>Department of Biology, Carleton University, 1125 Colonel By Drive, Ottawa, ON K1S 5B6,  
11 Canada

12 **\*Correspondence to:** [K.Hirsh.Pearson@gmail.com](mailto:K.Hirsh.Pearson@gmail.com)

13 **Abstract:** Efforts are underway in Canada to set aside terrestrial lands for conservation, thereby  
14 protecting them from anthropogenic pressures. Here we produce the first Canadian human  
15 footprint map to identify intact and modified lands and ecosystems. Our results showed strong  
16 spatial variation in pressures across the country, with just 18% of Canada experiencing measurable  
17 human pressure. However, some ecosystems are experiencing very high pressure, such as the  
18 Great Lakes Plains and Prairies national ecological areas which have over 75% and 56% of their  
19 areas, respectively, with a high human footprint. In contrast, the Arctic and Northern Mountains  
20 have less than 0.02% and 0.2% under high human footprint. A validation of the final map resulted  
21 in a Cohen Kappa statistic of 0.911, signifying an ‘almost perfect’ agreement between the human  
22 footprint and the validation data set. By increasing the number and accuracy of mapped pressures,  
23 our map demonstrates much more widespread pressures in Canada than were indicated by previous  
24 global mapping efforts, demonstrating the value in specific national data applications. Ecological  
25 areas with immense anthropogenic pressure, highlight challenges that may arise when planning  
26 for ecologically representative protected areas.

27 **Keywords**

28 Human Pressures, Human footprint, cumulative pressures, pressure mapping, multiple pressures,  
29 threats

## 30 **Introduction**

31 Global pressures to biodiversity are increasing as human use continues to alter terrestrial  
32 ecosystems (Steffen et al., 2015; Venter et al., 2016a), leading to accelerating biodiversity  
33 declines (Maxwell et al., 2016; Newbold et al., 2015). Anthropogenic pressures to biodiversity are  
34 actions taken by humans that have the potential to harm natural systems (Venter et al., 2016a).  
35 Pressures on a landscape interact with each other in a complex manner and vary in their spatial  
36 and temporal scales making their understanding essential for conservation planning (Geldmann et  
37 al., 2014; Primack, 1993; Tapia-Armijos et al., 2017). Identifying the patterns of change in these  
38 pressures provides the basis for mitigating environmental damage (Halpern et al., 2015; Venter et  
39 al., 2016a).

40 When pressures are analysed, especially those from resource development projects, the focus is  
41 often on the project in isolation of other developments (Johnson, 2016). By incorporating more  
42 than one pressure, it is possible to develop a more complete understanding of the interacting  
43 pressures on biodiversity, with the potential to assess the impacts for ecosystem services (Halpern  
44 et al., 2008). Cumulative pressure mapping allows for the combination of more than one  
45 pressure to show the full extent and intensity of anthropogenic pressures (Tapia-Armijos et al.,  
46 2017)). Cumulative pressure maps, also known as human footprint maps, combine pressures into  
47 a single product which can be used for making conservation plans that yield the greatest  
48 benefits, including directing development to areas that will cause the least amount of harm (Crain  
49 et al., 2009; Venter et al., 2016a).

50 As a signatory of the Convention on Biodiversity and its Aichi Biodiversity Targets, Canada's  
51 Target 1 is to protect 17% of terrestrial and 10% of marine areas (MacKinnon et al., 2015). With  
52 this ambitious conservation target there is a need to better understand the distribution of pressures

53 to natural systems across Canada. A nation-wide map of human pressures is important for  
54 identifying the ecosystems that are most intact and the areas with the greatest intensity of human  
55 pressures. Intactness is defined as landscapes that maintain biological and ecological function and  
56 are mostly free of human disturbances. This definition does not exclude Indigenous peoples and  
57 their stewardship practices, but it does exclude large-scale land conversion, human activity and  
58 development (Waller and Reo, 2018; Watson et al., 2016). Mapping the human footprint will serve  
59 as an important step in selecting which areas to protect, restore and sustainably manage.

60 Canada's natural systems have a number of pressures that negatively affect biodiversity. Woo-  
61 Durand et al. (2020) analysed pressures to 820 species identified as "at-risk" by the Committee on  
62 the Status of Endangered Wildlife in Canada (COSEWIC). They found that the number of  
63 pressures affecting each species has increased significantly from an average of 2.5 to 3.5 between  
64 1999 and 2018. Such findings highlight the need to map pressures in Canada cumulatively and not  
65 in isolation (Venter et al., 2006; Woo-Durand et al., 2020). Nevertheless, no cumulative pressure  
66 map covers the entirety of the country. At present, Canada has cumulative pressure maps for parts  
67 of the coastal waters (Ban and Alder, 2008; Ban et al., 2010; Clarke Murray et al., 2015a, 2015b)  
68 and two studies covering freshwater (Robb, 2014; Sterling et al., 2014). For terrestrial studies, the  
69 greatest coverage spans the largest ecological area of Canada, the Boreal/Taiga (Pasher et al.,  
70 2013). Other terrestrial maps cover sections of western Canada (Mann and Wright, 2018;  
71 Shackelford et al., 2017), part of eastern Canada and the United States (Woolmer et al., 2008) and  
72 the whole of Canada to display the number of pollution pressure categories present (McCune et  
73 al., 2019). In addition to human footprint maps, a map exists showing the presence and absence of  
74 access into nature across Canada (Lee and Cheng, 2014). However, a simple map of access does  
75 not fully represent the spectrum of human pressures, such as the contrast between large

76 metropolitan cities and smaller resources centric towns (Lee and Cheng, 2014), or landscapes  
77 under pressure from resource extraction. The global human footprint map displays Canada as  
78 mostly intact (Venter et al., 2016a, 2016b), however that includes only a subset of pressures  
79 relevant to the country, missing critical data for the Canadian context, such as mining and forestry.  
80 Therefore, until a national human footprint is produced, there will continue to be a gap in our  
81 understanding for the Canadian human footprint.

82 Here, we used geospatial techniques to develop a map for Canada that represents nationally-  
83 specific pressures that are not incorporated in coarse-scale global maps. Using a higher spatial  
84 resolution of 300 metres, we produced the first national terrestrial human footprint of Canada. We  
85 visually and quantitatively compared the global and national products and identified improvements  
86 and errors in the representation of human pressures. We used high-resolution satellite imagery to  
87 validate the accuracy of the final footprint map. As the maintenance of biodiversity and ecosystem  
88 services depends on the comprehensive understanding of the full set of overlapping pressures (Sala  
89 et al., 2000), the results of this project will be important for identifying future conservation lands  
90 across Canada as well as ecosystems that are in need of protection and restoration.

## 91 **Methods**

### 92 **Overview**

93 To produce the Canadian human footprint, we adopted the methods originally developed by  
94 Sanderson et al. (2002) and later refined by Venter et al. (2016a, 2016b). The pressures we mapped  
95 for Canada were: (1) the extent of built environments; (2) crop land; (3) pasture land; (4) human  
96 population density; (5) nighttime lights; (6) railways; (7) roads; (8) navigable waterways; (9) dams  
97 and associated reservoirs; (10) mining activity; (11) oil and gas; and (12) forestry. Each

98 anthropogenic pressure was placed on a 0-10 scale to allow for comparison across pressures.  
99 Scoring methods were selected from pre-existing peer-reviewed articles following Venter et al.  
100 (2016a, 2016b) and Woolmer et al. (2008) methods and one pressure layer following methods used  
101 in Jarvis et al. (2010). After scoring, all non-compatible land uses were analysed and adjusted to  
102 avoid spatial overlap. Non-compatible land uses included built environments, crop land, mining  
103 and pasture land. We eliminated any pixels from the given layers that overlapped with built  
104 environments, then did the same operation for crop land and mining. The order of priority, to adjust  
105 for spatial overlap, reflected how high up on the 0-10 scale the individual layers placed. To produce  
106 the final product of the terrestrial human footprint map of Canada, all the weighted layers were  
107 summed together. Individual pressures may overlap spatially and are therefore not mutually  
108 exclusive. Thus, each cell could range in value from 0-55 for any given grid cell, representing the  
109 observed maximum. The map was generated at a spatial resolution of 300 metres, yielding over  
110 99,000,000 pixels. ArcGIS 10.5.1 and the Lambert Conformal Conic projection were used for all  
111 spatial analyses. Specific details on each of the pressure layers are provided in the following  
112 sections.

### 113 Built environments

114 Built environments are lands that are constructed for human activity and include buildings, paved  
115 surfaces, and urban areas. Land transformation from built environments leads to habitat loss and  
116 fragmentation, changes in nutrient and hydrological flows, reduction of viable habitats for species  
117 and decreased temperature regulation and carbon sequestration (Haase, 2009; Tratalos et al.,  
118 2007).

119 We acquired data from the 2016 annual crop inventory (Government of Canada; Agriculture and  
120 Agri-Food Canada; Science and Technology Branch, 2016), which provides a 30 metre spatial

121 resolution of land-use type and applied the subset of the ‘urban/developed’ lands for the layer.

122 The data does not include Yukon, Northwest and Nunavut territories, and therefore we captured  
123 the anthropogenic pressures for the northern territories through other layers such as: population  
124 density, nighttime lights and roads. The data are a combination of satellite imagery: Landsat-8,  
125 Sentinel-2 and Gaofen-1 for optical imagery with RADARSAT-2 radar imagery, generating an  
126 accuracy of at least 85% (Government of Canada; Agriculture and Agri-Food Canada; Science  
127 and Technology Branch, 2016). Built environments were assigned a score of 10 (Venter et al.,  
128 2016a, 2016b).

129 Population density

130 Human population density is linked to biodiversity loss (Cincotta and Engelman, 2000). Presence  
131 of high human populations has led to over-hunting, deforestation and introduced species (Prebble  
132 and Wilmshurst, 2009). Though Canada generally has a low population density, averaging four  
133 people per square kilometre, there have been significant increases in introduced species, over-  
134 exploitation and pollution from 1999-2018 (Government of Canada; Statistics Canada, 2017a;  
135 Woo-Durand et al., 2020).

136 Human population density was mapped using a subset of the 2016 Canadian Census Data which  
137 provides more detailed information than the Gridded Population of the World dataset (Government  
138 of Canada; Statistics Canada, 2017a; Venter et al., 2016b). The vector layer used was the Census  
139 Dissemination Blocks, the smallest unit with an associated population, available through the Geo  
140 Suite 2016, a Statistics Canada tool we used for data retrieval (Government of Canada; Statistics  
141 Canada, 2016). Following Venter et al. (2016a, 2016b), we calculated population density for each  
142 block; any block that had more than 1,000 people per square kilometre we assigned a pressure  
143 score of 10. For more sparsely populated areas, we logarithmically scaled the pressure score as

144 follows:

145  $\text{Pressure Score} = 3.333 * \log(\text{Population density} + 1)$

146 Nighttime lights

147 Nighttime lights captures the sparser electric infrastructure found in rural, suburban and working

148 areas that have an associated pressure on natural environments (Venter et al. 2016a, 2016b).

149 The Visible Infrared Imaging Radiometer Suite (VIIRS), mounted on the Sumo National Polar

150 Partnership satellite, provides the means to collect and map low light sources such as nighttime

151 lights (Elvidge et al., 2013).

152 We used an annual composite from 2016 generated by the National Oceanic and Atmospheric

153 Administration (NOAA) to assess nighttime lights. The spatial resolution of the data is 589 metres

154 (15 arc-second geographic grids). For areas above 67N, that were not included in the annual

155 composite, we randomly selected a single date of imagery to fill the northern section and compared

156 it to other dates to make sure it was not an outlier (NOAA, 2019). We then rescaled the data on a

157 0-10 scale using an equal quintile approach (Venter et al. 2016a, 2016b).

158 Crop and pasture land

159 Agriculture is recognised as one of the most important pressures to biodiversity globally (Ricketts

160 and Imhoff, 2003). For the Canadian human footprint, we used the 2016 annual crop

161 inventory which includes pasture, agricultural land, cereals, pulses, oil seeds, vegetables,

162 fruits and other crops (Government of Canada; Agriculture and Agri-Food Canada; Science and

163 Technology Branch, 2016). Satellite imagery from optical (Landsat-8, Sentinel-2 and Geifen-1)

164 and radar (RADARSAT-2) was used to obtain a spatial resolution of 30 metres. There was also

165 ground-truth information provided by several organizations. The provincial accuracy for crop



166 class had a minimum of 86.27% and a maximum accuracy of 94.51% (Government of Canada;  
167 Agriculture and Agri-Food Canada; Science and Technology Branch, 2016). we assigned crops a  
168 pressure score of 7 (Venter et al. 2016a, 2016b).

169 Pasture lands are areas that are grazed by domesticated livestock. Pastures are often associated  
170 with fences, soil compaction, intensive browsing, invasive species and altered fire  
171 regimes (Kauffman and Krueger, 1984). Using the annual crop inventory (30 metre spatial  
172 resolution) (Government of Canada; Agriculture and Agri-Food Canada; Science and Technology  
173 Branch, 2016), We assigned pastures a pressure score of 4 (Venter et al. 2016a, 2016b).

174 Roads and railways

175 Roads are linear features that directly convert and fragment habitats. Roads can alter the immediate  
176 physical and chemical environments, provide access for human recreation into intact areas, allow  
177 for the spread of invasive species and be a sink for populations through vehicle collisions and  
178 mortality from construction (Trombulak and Frissell, 2000).

179 We used the publicly available 2016 National Road Network vector layer produced  
180 by Statistics Canada (Government of Canada; Statistics Canada, 2017b). The data are divided into  
181 different categories of use: Trans-Canada highway, national highway system, major  
182 highway, secondary highways, major streets and all other streets. We adapted the weights  
183 developed by Woolmer et al. (2008) assessing roads as an access point into intact areas (Table 1).

184 Railways provide a direct pressure to the ecosystems that host them, however, in terms of access  
185 they differ from roads. For roads and railways, direct pressures exist as a result of the actual  
186 footprint such as physical removal of viable habitat or reduction in the quality of it, indirect  
187 pressures may present themselves in the form of altering ecological functions, edge effect,

188 reducing connectivity or other human disturbances made possible by the direct pressure (Burton  
189 et al., 2014). However, discontinued rail lines provide an indirect pressure as they can be used as  
190 a means of dispersal of humans and their activities into landscapes. Conversely, operational rails  
191 only allow for human access from individual rail stations. We used the publicly available National  
192 Railway Network vector layer (Government of Canada; Natural Resources Canada, 2016) and  
193 adapted the methods from Woolmer et al. (2008) (Table 2).

#### 194 Navigable waterways

195 Navigable waterways like roads and rails act as means of access to wilderness areas. Canada's  
196 waterways have a long history of human use as they have enabled travel from sea to sea (Brine,  
197 1995). Once the people's 'highway', settlements were formed along the waterways to allow  
198 movement and access. Used by First Nations in pre-colonial times, the knowledge was shared  
199 when the first European explorers arrived. These waterways were later instrumental in the fur trade  
200 (Brine, 1995; O'Donnell, 1989).

201 We used the dataset generated for navigable coasts for 2009 from the global human footprint with  
202 a 1 km<sup>2</sup> spatial resolution (Venter et al., 2016b). The layer included the Great Lakes, as they can  
203 act like inland seas and was generated using distance to settlements, stream depth and hydrological  
204 data (Venter et al., 2016b). We found the centreline of the waterway then weighted them to follow  
205 the other access-based layers (Table 3).

#### 206 Dams and reservoirs

207 Dams directly change hydrology of the areas and they modify the  
208 environment, often producing human-made flooded reservoirs (Woolmer et al., 2008). The vector  
209 dataset was obtained from 'Large Dams and Reservoirs of Canada' (Global Forest Watch Canada,

210 2010). We mapped the dam itself just as we would a built environment, scoring it as 10 (Venter et  
211 al., 2016a, 2016b; Woolmer et al., 2008). We scored dams and associated reservoirs in the same  
212 manner as navigable waterways given that they can provide additional access to areas by watercraft  
213 (Table 3).

## 214 Mining

215 Mining often alters topography, watercourses and removes topsoil as a form of land conversion.  
216 Mining can be a point source for air and water pollution (Woolmer et al., 2008). We used the mines  
217 and minerals dataset, updated in 2015, to obtain all active mines in Canada. The data were discrete  
218 points in vector format (Government of Canada; Natural Resources Canada, 2017). We placed the  
219 mineral groups in their designated categories: open large, open small, underground large and  
220 underground small (WWF Canada, 2003). For the minerals that were not previously classified by  
221 Woolmer et al. (2008) we consulted with an expert to determine if the mineral group would be  
222 mined underground or in an open pit (McGill, 2018). Once confirmed to be open or underground,  
223 we placed them all in the small category, for open pit and underground mining, as a way to make  
224 sure we did not over-estimate the pressure. The scoring from Woolmer et al. (2008) was used for  
225 mines (Table 4).

## 226 Oil and gas

227 Oil and gas production have a number of associated pressures to nature such as wildlife mortality,  
228 habitat fragmentation and loss, noise and light pollution, introduction of invasive species and  
229 sedimentation of waterways (Brittingham et al., 2014; Jones et al., 2015). The mines and minerals  
230 dataset, updated in 2015, was used as it lists active oil and gas fields. The data were discrete points  
231 in vector format (Government of Canada; Natural Resources Canada, 2017). The direct pressures

232 from oil and gas have been found to be highly localized, therefore, we adapted the scoring  
233 method using a 10 to 0 scale to score the linear circular decay out to five kilometres away from  
234 the site centre (Jarvis et al., 2010).

## 235 Forestry

236 Forestry operations alter the forest structure by changing stand dynamics and age (Freedman et al.,  
237 1994). Clear cut forestry can remove habitat for species dependent on old trees, deadwood  
238 and tree cavities and, by altering paths of travel and allowing for deep snow to form. Forestry  
239 operations could also introduce species and allow for more access for recreation including hunting  
240 through the creation of forestry roads (Freedman et al., 1994).

241 The forest-harvest data were obtained from an annual forest disturbance characterization project  
242 for Canada that has a 30-metre spatial resolution (White et al., 2017). The timescale of the harvest  
243 recorded was from 1985-2015. We separated fresh clear cuts and areas that have reached their  
244 free-to-grow state, as they offer different habitat qualities (Bergeron et al., 2011). We  
245 selected 12 years as a common value for free-to-grow, so anything from 0-12 years would be  
246 considered early regenerating forest (Liefvers et al., 2002; Smith, 1983). We adapted the scoring  
247 from Woolmer et al. (2008) with early regeneration scored as 4 and older regeneration as  
248 2 (Woolmer et al., 2008).

## 249 Technical Validation

250 Following the methods used by Venter et al. (2016a, 2016b), a single person used high resolution  
251 satellite imagery to visually identify human pressures within 5,000, 1-km<sup>2</sup> randomly located  
252 sample plots. Using World Imagery, available through ArcGIS, the 5,000 plots had a median  
253 resolution of 0.5 metres and a median acquisition year of 2014 (ArcGIS, n.d.).

254 We used Venter et al. (2016a, 2016b) methods to develop a standardized key to visually interpret  
255 the pressures. For the eight pressures that both our Canadian human footprint and the global human  
256 footprint had in common we mimicked their scoring, but for the new pressures included in our  
257 study we simply followed their standards for linear or polygons features (Supplementary  
258 Information, S1). Interpretations were marked if they were ‘certain’ or ‘uncertain’; in our case 254  
259 plots were ‘uncertain’ and therefore discarded, leaving 4,746 validation plots. Generally, plots  
260 were classified as ‘uncertain’ for two main reasons: due to inadequate resolution of the imagery  
261 (15 metres) so it was not clear if there were any pressures present on the land, or because of cloud  
262 cover obscuring some or all of the image. The plots that were retained for the visual scoring were  
263 all ‘certain’ and we therefore consider the in-situ pressures for the plot as true. The mean human  
264 footprint score for the 1-km<sup>2</sup> plots were determined in ArcGIS, then both the visual and human  
265 footprint scores were normalized on a 0-1 scale.

266 The root mean squared error (Chai and Draxler, 2014) and the Cohen kappa statistic of agreement  
267 (Viera and Garrett, 2005) were used to quantify the level of agreement between the Canadian  
268 footprint map and the validation dataset. The root mean squared error measures the differences  
269 between the values calculated in the human footprint and the visual scores from the validation. As  
270 the error is squared, outliers are emphasized with this statistical calculation. The Cohen kappa  
271 statistic of agreement expresses the agreement between the human footprint scores and the visual  
272 interpretation scores considering the potential that agreement or disagreement may occur by  
273 chance. Following previous analyses (Venter et al., 2016a, 2016b), visual plots that were within  
274 20% of the human footprint plots scores were considered a match for the Cohen kappa statistic.

## 275 **Results**

### 276 1. The Canadian human footprint

277 Canada has an area-weighted average human footprint score of 1.48, and the maximum observed  
278 score for the country is 55 out of a theoretical 66. The pressures across Canada display strong  
279 spatial patterns, showing higher values in Southern Canada where the majority of the country's  
280 population lives (Fig. 1). With the 12 pressures included, we found that 82% of Canada's land  
281 areas had a human footprint score of less than 1, and therefore were considered intact (Allan et al.,  
282 2017). In this context, intact is defined as landscapes that are mostly free of the 12 human  
283 disturbances we mapped. To conceptualize this definition of intact, cells that had a population  
284 density of one or more people per square kilometre obtained a pressure score of one or above and  
285 were therefore not considered intact. However, pressures such as seismic lines, pollution or  
286 invasive species were not mapped and may be present in areas that we identified as intact. The low  
287 human footprint state was defined as areas where the human footprint score was between one and  
288 four. The upper limit was determined based on the assignment of a score of four for pasture land,  
289 which would often have fences fragmenting the connectedness (Venter et al., 2016a).  
290 Approximately 5% of Canada was classified in the low human footprint state. The moderate human  
291 footprint areas had scores between four and 10 and covered 7% of the country. The areas of high  
292 human footprint, with a value of 10 or higher, covered 6% of Canada and highlighted areas with  
293 multiple overlapping pressures to biodiversity (Fig. 1).

294 We used national ecological areas defined by COSEWIC as a means of comparing the different  
295 ecological regions of Canada (COSEWIC, 2018). The human footprint differs markedly across  
296 those areas, with 84% of the Boreal ecological area, which covers the largest extent of Canada,  
297 still being intact. The Great Lakes Plains, the smallest ecological area, has 76% in the high human  
298 footprint category, being the largest percentage in the high category compared to all other  
299 ecological areas. The Prairies follow the Great Lakes Plains as the second largest values in the

300 high human footprint category with 57%. The Great Lakes Plains has the smallest percentage in  
301 the intact category with a value of 0.6% followed by the Prairies with 8%. Conversely, the Arctic,  
302 which is the second largest ecological area, is over 99% intact.

303 The pressure layer that contributes the most towards the mean human footprint of Canada is roads  
304 with a mean human footprint score of 0.72 (Fig. 2) and covering over 1,000,000 km<sup>2</sup>. Crop land is  
305 the second most prevalent pressure with a mean human footprint score of 0.27. The only other  
306 pressure above 0.10 was population density with a value of 0.20. In terms of extent, population  
307 density covers just under one third of Canada, an area of 3,200,000 km<sup>2</sup>. While nighttime lights  
308 cover over 200,000 km<sup>2</sup>, they have a relatively small mean human footprint of 0.01.

## 309 2. The Canadian versus the Global human footprint

310 Visually comparing the global human footprint (Venter et al., 2016a) to the national version at a  
311 broad scale shows similarities in the spatial patterns of anthropogenic pressures (Supplementary  
312 Information, S2). Closer examination shows a number of variations in the details. In agricultural  
313 areas, such as the prairies ecological region, the Canadian human footprint shows a higher  
314 concentration of pressures than the global one (Fig. 3 a, b, c). For urban areas, the Canadian human  
315 footprint captures the distinction between areas such as parks, urban areas and industrial areas  
316 showing a lower human footprint score than the global one (Fig. 3 d, e, f). In natural resource  
317 intensive areas, higher scores for the Canadian human footprint are present compared to the global  
318 product that missed these features across Canada. For example, in the boreal ecological area,  
319 forestry harvest and infrastructure from oil and gas could be included with the Canadian human  
320 footprint (Fig. 3 g, h, i).

321 When mapping nationally explicit data the greatest improvements to the global datasets were found

322 with the National Roads Network and the Annual Crop Inventory. The global human footprint  
323 scores roads within Canada as 50% less of a pressure than the Canadian human footprint. The  
324 Annual Crop Inventory that was used for mapping crop land for Canada captured over 285,000  
325 km<sup>2</sup> more than the global product (Fig. 2).

### 326 3. Validation results

327 Our validation shows a strong agreement between the Canadian human footprint measure of  
328 pressures and the pressures scored using visual interpretation of high-resolution images. The root  
329 mean squared error for 4,746 validation 1-km<sup>2</sup> plots was 0.07 on a normalized 0–1 scale (Chai and  
330 Draxler, 2014). The Cohen Kappa statistic was 0.911, signifying ‘almost perfect’ agreement  
331 between the human footprint and the validation data set (Landis and Koch, 1977; Viera and Garrett,  
332 2005). We scored 40 of the validation plots as having a pressure score 20% higher than the initial  
333 visual interpretation (false positive) and 113 20% lower (false negative). The remaining 4,593  
334 plots (96.8%) were within 20% agreement. While the results from the validation represent almost  
335 perfect agreement, it appears from the higher false-negative rate that the human footprint map may  
336 be underrepresenting the pressure scores across some proportion of the country. The maps should  
337 therefore be considered as conservative estimates of anthropogenic pressures on the environment  
338 (Fig. 4). When applying a more rigorous threshold for agreement, within 15% of one another, we  
339 found that the Cohen Kappa statistic was of substantial strength with a score of 0.772. When  
340 applying a less rigorous threshold of 25%, the Cohen Kappa statistic increased to 0.952 (almost  
341 perfect strength) (Supplementary Information, S3).

342 We compared the validation results for the Canadian human footprint with those of the global  
343 human footprint clipped to Canada. The global human footprint obtained a root mean squared error  
344 of 0.10 on a normalized 0–1 scale for the same validation plots (Chai and Draxler, 2014). For the



345 Cohen Kappa statistic, the value was 0.762 using 20% agreement, which is considered substantial  
346 agreement between the human footprint and the validation data set, demonstrating lower  
347 agreement than the Canadian product (Landis and Koch, 1977; Viera and Garrett, 2005).

## 348 **Discussion**

349 This is the first undertaking to produce a continuous measure of human pressures across Canada,  
350 which we term the Canadian human footprint. While we find that the large majority of Canada is  
351 still considered intact (82%), by our definition, some ecosystems are still exposed to numerous  
352 and intense pressures. Our dataset improves upon the global product by increasing the number of  
353 relevant pressures measured and by rescaling to a finer resolution using national datasets.  
354 Understanding where there are overlapping pressures on the natural system provides more insight  
355 for preventing and mitigating pressures to biodiversity than an access map of Canada that acts as  
356 a binary presence or absence of access.

### 357 Intactness in Canada

358 Intact areas worldwide are crucial for conserving threatened biodiversity (Di Marco et al., 2019),  
359 yet they experience increasing pressures from human land use. There is therefore a need to protect  
360 intact areas to help conserve biodiversity and ecosystem services. Furthermore, the importance of  
361 large-scale and intact ecosystems is increasing as these areas become rarer (Watson et al., 2016).  
362 When applying the 12 anthropogenic pressures, to the eight national ecological areas in Canada,  
363 we find that five of those areas have a terrestrial land mass that is over 50% in an intact state. In  
364 particular, the Arctic has over 99%, the Northern Mountains has over 95% and the Boreal follows  
365 with over 83%. This demonstrates promising opportunities for the three largest ecological areas in  
366 Canada. However, the Boreal is experiencing significant forest loss and degradation from natural

367 resource exploration, industrial forestry, rapid climate change and anthropogenic fires (Watson et  
368 al., 2016). Although faced with criticism, the Canadian Boreal Forest Conservation Framework  
369 provides an outline on how to protect at least 50% of the forest through a network of connected  
370 protected areas, to prevent excessive degradation, which is crucial to protect wilderness areas of  
371 Canada (Boreal Leadership Council, 2003; Nishnawbe Aski Nation, n.d.).

372 Canada has little intact areas left in three of the eight ecological areas (Great Lakes Plains, Prairies  
373 and Atlantic). Our human footprint shows where species are experiencing the most anthropogenic  
374 pressures and would likely have the least intact natural ecosystem for disturbance sensitive species.  
375 However, it is known that certain species can thrive in large cities and built environments  
376 (Sanderson et al., 2002). As mentioned above, Canada's Target 1 of 17% conservation of terrestrial  
377 lands requires those areas to be representative of the county's ecosystems (Convention on  
378 Biological Diversity, 2020). With the Atlantic, Prairies and Great Lakes Plains areas containing  
379 less than 24%, 8% and 1% of intact lands respectively, it is unclear how Canada will develop  
380 protected areas that represent the ecosystems in those regions, without restoration.

### 381 Pressures on Biodiversity

382 One of the most prevalent pressures to intactness and biodiversity are roads. The existence and  
383 expansion of roads to connect communities and resource areas are direct and indirect pressures to  
384 ecosystems, such as fragmenting habitats and by providing a means of access into intact areas (Lee  
385 and Cheng, 2014; Sanderson et al., 2002). For conservation efforts, roads are one of the important  
386 pressures to address (van der Marel et al., 2020), especially in Canada where we find roads are the  
387 most prevalent pressure.

388 Conservation planning recognises the need to understand the patterns of pressures and how they  
389 interact (Margules and Pressey, 2000; Tulloch et al., 2015). When assessing national at-risk

390 species, the Canadian Living Planet Index found a 59 per cent decline in these at-risk populations  
391 between 1970 and 2016 (WWF Canada, 2020). A global analysis of over 8,000 threatened or near-  
392 threatened species found that overexploitation was the most important pressure, followed by  
393 agricultural activities and then urban development (Maxwell et al., 2016). For our analysis, those  
394 pressures were represented by the footprint of crop land, forestry, built environments and pasture  
395 land, all of which fall within the top six mean human footprint scores for Canada. With Canada's  
396 "at-risk" species facing more than one pressure (Woo-Durand et al., 2020), the utility of the  
397 Canadian human footprint, which includes the pressures that are most affecting biodiversity  
398 (Maxwell et al., 2016), is an important tool for conservation planning and the mitigation of such  
399 pressures.

#### 400 Data comparison: Global vs. Canadian

401 While the overall intensity, or the mean human footprint score, remained low for Canada, we found  
402 several differences when comparing global and national human footprints. The most significant  
403 difference in the mean human footprint score was found in nighttime lights. Nighttime lights for  
404 Canada had a mean human footprint score 18 times less than in the global human footprint. The  
405 reduction in score from the global to the national product is the result of using more recent and  
406 higher resolution imagery that addresses saturation and spillage observed with the global product  
407 (Elvidge et al., 2013).

408 Producing the human footprint for Canada allows us to include datasets that are nationally relevant  
409 and offer more information and detail than many of the global footprint maps. The largest increase  
410 in mean human footprint score comes from crop land which has a mean human footprint score  
411 over six times more extensive than that in the global product. The improved accuracy for mapping  
412 crop land could be part of the reason we see higher footprint values in the Prairies when compared

413 to the global product, as the Prairies are a large agricultural centre for the country. Furthermore,  
414 the Canadian dataset for roads allowed for the inclusion of minor roads which the global dataset  
415 could not include (Venter et al., 2016b). The Canadian data also led to a near doubling of the mean  
416 human footprint score for roads when compared to Canada's score with the global data. However,  
417 there is still room for improvement in mapping linear infrastructure in Canada. When we compare  
418 the national roads with some provincial road data, we find that the national data do not capture all  
419 the resource roads and some of the smaller roads that are mapped at a provincial or territorial scale.  
420 The global human footprint and the Canadian human footprint show the same overall patterns of  
421 pressures. However, we find more disagreements in areas where there are more cumulative  
422 pressures. By developing a finer resolution national product with Canadian data, we can measure  
423 the improvements from global human footprints and confirm the soundness of our human footprint  
424 with the almost perfect validation score. This demonstrates the importance of national studies for  
425 conservation of biodiversity and ecosystem services (Woolmer et al., 2008).

#### 426 Future directions

427 This is the first national product for the Canadian human footprint, with room for future  
428 refinements. Firstly, linear features besides roads, such as seismic lines or outdoor recreation such  
429 as trails, should be included if possible, in future revisions. These features appeared in  
430 approximately 1% of the validation plots but were not mapped as there were no national datasets  
431 for oil and gas exploration and recreation. Also, recreation more broadly can have significant  
432 impacts (Mullins and Wright, 2016), and should be included as data become available. These data  
433 should be a priority for future improvements to our work. Other pressures such as extreme weather  
434 and introduced species are important, but inherently difficult to map (Venter et al., 2006; Woo-  
435 Durand et al., 2020).

436 Secondly, the built environments dataset did not cover the full extent of the country (only to 59  
437 degrees north), therefore the theoretical max north of 59 degrees latitude is 10 lower for the human  
438 footprint, leading to a potential underestimation of anthropogenic pressure. This is unlikely to be  
439 a major omission, as these pressures are sparse or absent above this latitude. Despite lower  
440 population density in the north, natural resource exploration has increased, bringing with it more  
441 temporary workers and work camps (Ensign et al., 2014). Thirdly, the datasets we used to map  
442 mining and oil and gas only provided point features. Further efforts are needed to develop complete  
443 polygon boundary and associated linear features that more accurately represent the geographic  
444 extent of the pressure. Lastly, our product is not immune to the limitations of spatial analyses such  
445 as mixed pixel problems, that arise when resampling to the resolution of the project; and the  
446 assumption of linear and consistent responses of ecosystems to pressures (Halpern and Fujita,  
447 2013). While there is certainly scope for further refinement, we do note that the validation of  
448 Canadian human footprint revealed in a much closer agreement between our dataset and actual  
449 observable pressures than previous efforts in other jurisdictions (Kennedy et al., 2019; Venter et  
450 al., 2016a; Williams et al., 2020).

## 451 **Conclusion**

452 Our Canadian human footprint map provides a baseline from which we can measure changes in  
453 human pressures across the country and into the future. Such information is critical for assessing  
454 the effectiveness of national and international policies and agreements designed to maintain  
455 biodiversity and expand Canada's conservation and protected lands. Our cumulative pressure map  
456 provides the first step towards being able to translate mapped pressures to the impacts of those  
457 pressures for biodiversity and ecosystem services. We demonstrate that Canada does contain large  
458 intact areas in line with Watson et al. (2016) who identified North America as with a critical

459 stronghold for large tracts of intact wilderness. Understanding how Canada’s intact lands are lost  
460 through cumulative human activities and associated pressures is crucial for the future prevention  
461 and mitigation of biodiversity loss and degradation of ecosystem services in a country where large  
462 intact areas still remain.

### 463 **Acknowledgements**

464 Project funding was provided by University of Northern British Columbia and Natural Science  
465 and Engineering Research Council (NSERC).

466 We are appreciative to M. Hirsh-Pearson, D. Pinkham, L. Spooner, the Conservation Solutions  
467 Lab members for the helpful comments during the production of the manuscript. We thank S.  
468 Emmons and P. Bai for GIS support and troubleshooting.

469

470 **References**

- 471 Allan, J.R., Venter, O., Watson, J.E.M., 2017. Temporally inter-comparable maps of terrestrial  
472 wilderness and the Last of the Wild. *Sci. Data* 4, 170187.  
473 <https://doi.org/10.1038/sdata.2017.187>
- 474 ArcGIS, n.d. World\_Imagery (MapServer). ESRI, Redlands, CA [WWW Document]. URL  
475 [http://services.arcgisonline.com/ArcGIS/rest/services/World\\_Imagery/MapServer](http://services.arcgisonline.com/ArcGIS/rest/services/World_Imagery/MapServer)  
476 (accessed 3.6.20).
- 477 Ban, N., Alder, J., 2008. How wild is the ocean? Assessing the intensity of anthropogenic marine  
478 activities in British Columbia, Canada. *Aquat. Conserv. Mar. Freshw. Ecosyst.* 18, 55–  
479 85. <https://doi.org/10.1002/aqc.816>
- 480 Ban, N.C., Alidina, H.M., Ardron, J.A., 2010. Cumulative impact mapping: Advances, relevance  
481 and limitations to marine management and conservation, using Canada’s Pacific waters  
482 as a case study. *Mar. Policy* 34, 876–886. <https://doi.org/10.1016/j.marpol.2010.01.010>
- 483 Bergeron, D.H., Pekins, P.J., Jones, H.F., Leak, W.B., 2011. Moose browsing and forest  
484 regeneration: A case study in Northern New Hampshire. *Alces J. Devoted Biol. Manag.*  
485 *Moose* 47, 39–51.
- 486 Boreal Leadership Council, 2003. Canadian Boreal Forest Conservation Framework 8.
- 487 Brine, R.H., 1995. Canada’s forgotten highway. Whaler Bay Press, Galiano, B.C.
- 488 Brittingham, M.C., Maloney, K.O., Farag, A.M., Harper, D.D., Bowen, Z.H., 2014. Ecological  
489 Risks of Shale Oil and Gas Development to Wildlife, Aquatic Resources and their  
490 Habitats. *Environ. Sci. Technol.* 48, 11034–11047. <https://doi.org/10.1021/es5020482>
- 491 Burton, A.C., Huggard, D., Bayne, E., Schieck, J., Sólymos, P., Muhly, T., Farr, D., Boutin, S.,  
492 2014. A framework for adaptive monitoring of the cumulative effects of human footprint

493 on biodiversity. *Environ. Monit. Assess.* 186, 3605–3617.  
494 <https://doi.org/10.1007/s10661-014-3643-7>

495 Chai, T., Draxler, R.R., 2014. Root mean square error (RMSE) or mean absolute error (MAE)? -  
496 Arguments against avoiding RMSE in the literature. *Geosci. Model Dev.* 7, 1247.

497 Cincotta, R.P., Engelman, R., 2000. Nature's Place: Human Population and the Future of  
498 Biological Diversity. Population Action International, Washington, DC.

499 Clarke Murray, C., Agbayani, S., Alidina, H.M., Ban, N.C., 2015a. Advancing marine  
500 cumulative effects mapping: An update in Canada's Pacific waters. *Mar. Policy* 58, 71–  
501 77. <https://doi.org/10.1016/j.marpol.2015.04.003>

502 Clarke Murray, C., Agbayani, S., Ban, N.C., 2015b. Cumulative effects of planned industrial  
503 development and climate change on marine ecosystems. *Glob. Ecol. Conserv.* 4, 110–  
504 116. <https://doi.org/10.1016/j.gecco.2015.06.003>

505 Convention on Biological Diversity, 2020. The Convention on Biological Diversity. Secretariat  
506 of the Convention on Biological Diversity, Montreal, Qc [WWW Document]. URL  
507 <https://www.cbd.int/convention/> (accessed 7.2.20).

508 COSEWIC, 2018. Cosewic / Cosepac - Guidelines for Recognizing Designatable Units.  
509 COSEWIC, Gatineau, QC [WWW Document]. URL  
510 [http://www.cosewic.ca/index.php/en-ca/reports/preparing-status-reports/guidelines-](http://www.cosewic.ca/index.php/en-ca/reports/preparing-status-reports/guidelines-recognizing-designatable-units)  
511 [recognizing-designatable-units](http://www.cosewic.ca/index.php/en-ca/reports/preparing-status-reports/guidelines-recognizing-designatable-units) (accessed 6.26.20).

512 Crain, C.M., Halpern, B.S., Beck, M.W., Kappel, C.V., 2009. Understanding and Managing  
513 Human Threats to the Coastal Marine Environment. *Ann. N. Y. Acad. Sci.* 1162, 39–62.  
514 <https://doi.org/10.1111/j.1749-6632.2009.04496.x>



- 515 Di Marco, M., Ferrier, S., Harwood, T.D., Hoskins, A.J., Watson, J.E.M., 2019. Wilderness areas  
516 halve the extinction risk of terrestrial biodiversity. *Nature* 573, 582–585.  
517 <https://doi.org/10.1038/s41586-019-1567-7>
- 518 Elvidge, C.D., Baugh, K.E., Zhizhin, M., Hsu, F.-C., 2013. Why VIIRS data are superior to  
519 DMSP for mapping nighttime lights. *Proc. Asia-Pac. Adv. Netw.* 35, 62.  
520 <https://doi.org/10.7125/APAN.35.7>
- 521 Ensign, P.C., Giles, A., Oncescu, J., 2014. Natural Resource Exploration and Extraction in  
522 Northern Canada: Intersections with Community Cohesion and Social Welfare. *J. Rural*  
523 *Community Dev.* 9, 112–133.
- 524 Freedman, B., Woodley, S., Loo, J., 1994. Forestry practices and biodiversity, with particular  
525 reference to the Maritime Provinces of eastern Canada. *Environ. Rev.* 2, 33–77.  
526 <https://doi.org/10.1139/a94-003>
- 527 Geldmann, J., Joppa, L.N., Burgess, N.D., 2014. Mapping Change in Human Pressure Globally  
528 on Land and within Protected Areas. *Conserv. Biol.* 28, 1604–1616.  
529 <https://doi.org/10.1111/cobi.12332>
- 530 Global Forest Watch Canada, 2010. Large Dams and Reservoirs of Canada.
- 531 Government of Canada; Agriculture and Agri-Food Canada; Science and Technology Branch,  
532 2016. Annual Crop Inventory.
- 533 Government of Canada; Natural Resources Canada, 2017. Principal Mineral Areas, Producing  
534 Mines, and Oil and Gas Fields in Canada.
- 535 Government of Canada; Natural Resources Canada, 2016. National Railway Network.
- 536 Government of Canada; Statistics Canada, 2017a. Population and Dwelling Count Highlight  
537 Tables, 2016 Census. Government of Canada, Ottawa, On [WWW Document]. URL

538 <https://www12.statcan.gc.ca/census-recensement/2016/dp-pd/hlt-fst/pd->  
539 [pl/Table.cfm?Lang=Eng&T=101&S=50&O=A](https://www12.statcan.gc.ca/census-recensement/2016/dp-pd/hlt-fst/pd-pl/Table.cfm?Lang=Eng&T=101&S=50&O=A) (accessed 5.9.19).  
540 Government of Canada; Statistics Canada, 2017b. Road Network File 2016.  
541 Government of Canada; Statistics Canada, 2016. Geosuite, Government of Canada, Ottawa, On  
542 [WWW Document]. URL <https://geosuite.statcan.gc.ca/geosuite/en/index> (accessed  
543 6.25.20).  
544 Haase, D., 2009. Effects of urbanisation on the water balance – A long-term trajectory. *Environ.*  
545 *Impact Assess. Rev.* 29, 211–219. <https://doi.org/10.1016/j.eiar.2009.01.002>  
546 Halpern, B.S., Frazier, M., Potapenko, J., Casey, K.S., Koenig, K., Longo, C., Lowndes, J.S.,  
547 Rockwood, R.C., Selig, E.R., Selkoe, K.A., Walbridge, S., 2015. Spatial and temporal  
548 changes in cumulative human impacts on the world’s ocean. *Nat. Commun.* 6, 7615.  
549 <https://doi.org/10.1038/ncomms8615>  
550 Halpern, B.S., Fujita, R., 2013. Assumptions, challenges, and future directions in cumulative  
551 impact analysis. *Ecosphere* 4, 1–11. <https://doi.org/10.1890/ES13-00181.1>  
552 Halpern, B.S., McLeod, K.L., Rosenberg, A.A., Crowder, L.B., 2008. Managing for cumulative  
553 impacts in ecosystem-based management through ocean zoning. *Ocean Coast. Manag.*  
554 51, 203–211. <https://doi.org/10.1016/j.ocecoaman.2007.08.002>  
555 Jarvis, A., Touval, J.L., Schmitz, M.C., Sotomayor, L., Hyman, G.G., 2010. Assessment of  
556 threats to ecosystems in South America. *J. Nat. Conserv.* 18, 180–188.  
557 <https://doi.org/10.1016/j.jnc.2009.08.003>  
558 Johnson, C.J., 2016. Defining and Identifying Cumulative Environmental, Health, and  
559 Community Impacts, in: *The Integration Imperative - Cumulative Environmental,*

- 560 Community and Health Effects of Multiple Natural Resource Developments. Springer  
561 International Publishing, pp. 21–45.
- 562 Jones, N.F., Pejchar, L., Kiesecker, J.M., 2015. The Energy Footprint: How Oil, Natural Gas,  
563 and Wind Energy Affect Land for Biodiversity and the Flow of Ecosystem Services.  
564 *BioScience* 65, 290–301. <https://doi.org/10.1093/biosci/biu224>
- 565 Kauffman, J.B., Krueger, W.C., 1984. Livestock Impacts on Riparian Ecosystems and  
566 Streamside Management Implications...A Review. *Rangel. Ecol. Manag. J. Range*  
567 *Manag. Arch.* 37, 430–438.
- 568 Kennedy, C.M., Oakleaf, J.R., Theobald, D.M., Baruch-Mordo, S., Kiesecker, J., 2019.  
569 Managing the middle: A shift in conservation priorities based on the global human  
570 modification gradient. *Glob. Change Biol.* 25, 811–826.  
571 <https://doi.org/10.1111/gcb.14549>
- 572 Landis, J.R., Koch, G.G., 1977. The Measurement of Observer Agreement for Categorical Data.  
573 *Biometrics* 33, 159–174. <https://doi.org/10.2307/2529310>
- 574 Lee, P., Cheng, R., 2014. Human Access in Canada’s Landscape, *Global Forest Watch Canada*  
575 *Bulletin*. Global Forest Watch Canada.
- 576 Lieffers, V.J., Pinno, B.D., Stadt, K.J., 2002. Light dynamics and free-to-grow standards in  
577 aspen-dominated mixedwood forests. *For. Chron.* 78, 137–145.  
578 <https://doi.org/10.5558/tfc78137-1>
- 579 MacKinnon, D., Lemieux, C.J., Beazley, K., Woodley, S., Helie, R., Perron, J., Elliott, J., Haas,  
580 C., Langlois, J., Lazaruk, H., Beechey, T., Gray, P., 2015. Canada and Aichi Biodiversity  
581 Target 11: understanding ‘other effective area-based conservation measures’ in the

582 context of the broader target. *Biodivers. Conserv.* 24, 3559–3581.  
583 <https://doi.org/10.1007/s10531-015-1018-1>

584 Mann, J., Wright, P., 2018. The human footprint in the Peace River Break, British Columbia  
585 (No. 2), Technical Report Series. Natural Resources and Environmental Studies Institute,  
586 University of Northern British Columbia, Prince George, BC.

587 Margules, C.R., Pressey, R.L., 2000. Systematic conservation planning. *Nature* 405, 243–253.  
588 <https://doi.org/10.1038/35012251>

589 Maxwell, S.L., Fuller, R.A., Brooks, T.M., Watson, J.E.M., 2016. Biodiversity: The ravages of  
590 guns, nets and bulldozers. *Nat. News* 536, 143. <https://doi.org/10.1038/536143a>

591 McCune, J.L., Colla, S.R., Cristine, L.E., Davy, C.M., Flockhart, D.T.T., Schuster, R., Orihel,  
592 D.M., 2019. Are we accurately estimating the potential role of pollution in the decline of  
593 species at risk in Canada? *FACETS*. <https://doi.org/10.1139/facets-2019-0025>

594 McGill, B., 2018. Mining related question.

595 Mullins, P., Wright, P., 2016. Connecting Outdoor Recreation, Community, and Health in Living  
596 Landscapes, in: *The Integration Imperative: Cumulative Environmental, Community and*  
597 *Health Impacts of Multiple Natural Resource Developments*. Springer International AG.

598 Newbold, T., Hudson, L.N., Hill, S.L.L., Contu, S., Lysenko, I., Senior, R.A., Börger, L.,  
599 Bennett, D.J., Choimes, A., Collen, B., Day, J., De Palma, A., Díaz, S., Echeverria-  
600 Londoño, S., Edgar, M.J., Feldman, A., Garon, M., Harrison, M.L.K., Alhusseini, T.,  
601 Ingram, D.J., Itescu, Y., Kattge, J., Kemp, V., Kirkpatrick, L., Kleyer, M., Correia,  
602 D.L.P., Martin, C.D., Meiri, S., Novosolov, M., Pan, Y., Phillips, H.R.P., Purves, D.W.,  
603 Robinson, A., Simpson, J., Tuck, S.L., Weiher, E., White, H.J., Ewers, R.M., Mace,

604 G.M., Scharlemann, J.P.W., Purvis, A., 2015. Global effects of land use on local  
605 terrestrial biodiversity. *Nature* 520, 45–50. <https://doi.org/10.1038/nature14324>

606 Nishnawbe Aski Nation, n.d. Canadian Boreal Forest Agreement. Nishnawbe Aski Nation,  
607 Thunder Bay, On [WWW Document]. URL [http://www.nan.on.ca/article/canadian-](http://www.nan.on.ca/article/canadian-boreal-forest-agreement-462.asp)  
608 [boreal-forest-agreement-462.asp](http://www.nan.on.ca/article/canadian-boreal-forest-agreement-462.asp) (accessed 8.6.20).

609 NOAA, 2019. Version 1 VIIRS Day/Night Band Nighttime Lights.

610 O'Donnell, B., 1989. Indian and Non-Native Use of Nitinat Lake and River An Historical  
611 Perspective, Native Affairs Division, Policy and Program Planning. Fisheries and Oceans  
612 Canada.

613 Pasher, J., Seed, E., Duffe, J., 2013. Development of boreal ecosystem anthropogenic  
614 disturbance layers for Canada based on 2008 to 2010 Landsat imagery. *Can. J. Remote*  
615 *Sens.* 39, 42–58. <https://doi.org/10.5589/m13-007>

616 Prebble, M., Wilmshurst, J.M., 2009. Detecting the initial impact of humans and introduced  
617 species on island environments in Remote Oceania using palaeoecology. *Biol. Invasions*  
618 11, 1529–1556. <https://doi.org/10.1007/s10530-008-9405-0>

619 Primack, R.B., 1993. *Essentials of Conservation Biology*. Sinauer Associates Inc.

620 Ricketts, T., Imhoff, M., 2003. Biodiversity, Urban Areas, and Agriculture: Locating Priority  
621 Ecoregions for Conservation. *Conserv. Ecol.* 8.

622 Robb, C.K., 2014. Assessing the Impact of Human Activities on British Columbia's Estuaries.  
623 *PLOS ONE* 9, e99578. <https://doi.org/10.1371/journal.pone.0099578>

624 Sala, O.E., Chapin, F.S., Iii, Armesto, J.J., Berlow, E., Bloomfield, J., Dirzo, R., Huber-Sanwald,  
625 E., Huenneke, L.F., Jackson, R.B., Kinzig, A., Leemans, R., Lodge, D.M., Mooney, H.A.,  
626 Oosterheld, M., Poff, N.L., Sykes, M.T., Walker, B.H., Walker, M., Wall, D.H., 2000.

- 627 Global Biodiversity Scenarios for the Year 2100. *Science* 287, 1770–1774.  
628 <https://doi.org/10.1126/science.287.5459.1770>
- 629 Sanderson, E.W., Jaiteh, M., Levy, M.A., Redford, K.H., Wannebo, A., Woolmer, G., 2002. The  
630 Human Footprint and the Last of the Wild. *BioScience* 52, 891–904.
- 631 Shackelford, N., Standish, R.J., Ripple, W., Starzomski, B.M., 2017. Threats to biodiversity from  
632 cumulative human impacts in one of North America’s last wildlife frontiers. *Conserv.*  
633 *Biol.* 32, 672–684. <https://doi.org/10.1111/cobi.13036>
- 634 Smith, H.C., 1983. Growth of Appalachian Hardwoods Kept Free to Grow from 2 to 12 Years  
635 after Clearcutting. Res Pap NE-528 Broomall PA US Dep. Agric. For. Serv. Northeast.  
636 For. Experiment Stn. 6p 528.
- 637 Steffen, W., Richardson, K., Rockström, J., Cornell, S.E., Fetzer, I., Bennett, E.M., Biggs, R.,  
638 Carpenter, S.R., Vries, W. de, Wit, C.A. de, Folke, C., Gerten, D., Heinke, J., Mace,  
639 G.M., Persson, L.M., Ramanathan, V., Reyers, B., Sörlin, S., 2015. Planetary boundaries:  
640 Guiding human development on a changing planet. *Science* 347, 1259855.  
641 <https://doi.org/10.1126/science.1259855>
- 642 Sterling, S.M., Garroway, K., Guan, Y., Ambrose, S.M., Horne, P., Kennedy, G.W., 2014. A  
643 new watershed assessment framework for Nova Scotia: A high-level, integrated approach  
644 for regions without a dense network of monitoring stations. *J. Hydrol.* 519, Part C, 2596–  
645 2612. <https://doi.org/10.1016/j.jhydrol.2014.07.063>
- 646 Tapia-Armijos, M.F., Homeier, J., Draper Munt, D., 2017. Spatio-temporal analysis of the  
647 human footprint in South Ecuador: Influence of human pressure on ecosystems and  
648 effectiveness of protected areas. *Appl. Geogr.* 78, 22–32.  
649 <https://doi.org/10.1016/j.apgeog.2016.10.007>

- 650 Tratalos, J., Fuller, R.A., Warren, P.H., Davies, R.G., Gaston, K.J., 2007. Urban form,  
651 biodiversity potential and ecosystem services. *Landsc. Urban Plan.* 83, 308–317.  
652 <https://doi.org/10.1016/j.landurbplan.2007.05.003>
- 653 Trombulak, S.C., Frissell, C.A., 2000. Review of Ecological Effects of Roads on Terrestrial and  
654 Aquatic Communities. *Conserv. Biol.* 14, 18–30. [https://doi.org/10.1046/j.1523-  
655 1739.2000.99084.x](https://doi.org/10.1046/j.1523-1739.2000.99084.x)
- 656 Tulloch, V.J., Tulloch, A.I., Visconti, P., Halpern, B.S., Watson, J.E., Evans, M.C., Auerbach,  
657 N.A., Barnes, M., Beger, M., Chadès, I., Giakoumi, S., McDonald-Madden, E., Murray,  
658 N.J., Ringma, J., Possingham, H.P., 2015. Why do we map threats? Linking threat  
659 mapping with actions to make better conservation decisions. *Front. Ecol. Environ.* 13,  
660 91–99. <https://doi.org/10.1890/140022>
- 661 van der Marel, R.C., Holroyd, P.C., Duinker, P.N., 2020. Managing human footprint to achieve  
662 large-landscape conservation outcomes: Establishing density limits on motorized route-  
663 user networks in Alberta’s Eastern Slopes. *Glob. Ecol. Conserv.* 22, e00901.  
664 <https://doi.org/10.1016/j.gecco.2019.e00901>
- 665 Venter, O., Brodeur, N.N., Nemiroff, L., Belland, B., Dolinsek, I.J., Grant, J.W.A., 2006. Threats  
666 to Endangered Species in Canada. *BioScience* 56, 903–910. [https://doi.org/10.1641/0006-  
667 3568\(2006\)56\[903:TTESIC\]2.0.CO;2](https://doi.org/10.1641/0006-3568(2006)56[903:TTESIC]2.0.CO;2)
- 668 Venter, O., Sanderson, E.W., Magrath, A., Allan, J.R., Beher, J., Jones, K.R., Possingham, H.P.,  
669 Laurance, W.F., Wood, P., Fekete, B.M., Levy, M.A., Watson, J.E.M., 2016a. Sixteen  
670 years of change in the global terrestrial human footprint and implications for biodiversity  
671 conservation. *Nat. Commun.* 7, 12558. <https://doi.org/10.1038/ncomms12558>

- 672 Venter, O., Sanderson, E.W., Magrath, A., Allan, J.R., Beher, J., Jones, K.R., Possingham, H.P.,  
673 Laurance, W.F., Wood, P., Fekete, B.M., Levy, M.A., Watson, J.E.M., 2016b. Global  
674 terrestrial Human Footprint maps for 1993 and 2009. *Sci. Data* 3, 160067.  
675 <https://doi.org/10.1038/sdata.2016.67>
- 676 Viera, A.J., Garrett, J.M., 2005. Understanding interobserver agreement: The kappa statistic.  
677 *Fam. Med.* 37, 360–363.
- 678 Waller, D., Reo, N., 2018. First stewards: ecological outcomes of forest and wildlife  
679 stewardship by indigenous peoples of Wisconsin, USA. *Ecol. Soc.*  
680 <https://doi.org/10.5751/ES-09865-230145>
- 681 Watson, J.E.M., Shanahan, D.F., Di Marco, M., Allan, J., Laurance, W.F., Sanderson, E.W.,  
682 Mackey, B., Venter, O., 2016. Catastrophic Declines in Wilderness Areas Undermine  
683 Global Environment Targets. *Curr. Biol.* 26, 2929–2934.  
684 <https://doi.org/10.1016/j.cub.2016.08.049>
- 685 White, J.C., Wulder, M.A., Hermosilla, T., Coops, N.C., Hobart, G.W., 2017. A nationwide  
686 annual characterization of 25 years of forest disturbance and recovery for Canada using  
687 Landsat time series. *Remote Sens. Environ.* 194, 303–321.  
688 <https://doi.org/10.1016/j.rse.2017.03.035>
- 689 Williams, B.A., Venter, O., Allan, J.R., Atkinson, S.C., Rehbein, J.A., Ward, M., Di Marco, M.,  
690 Grantham, H.S., Ervin, J., Goetz, S.J., Hansen, A.J., Jantz, P., Pillay, R., Rodríguez-  
691 Buriticá, S., Supples, C., Virnig, A.L.S., Watson, J.E.M., 2020. Change in Terrestrial  
692 Human Footprint Drives Continued Loss of Intact Ecosystems. *One Earth* 3, 371–382.  
693 <https://doi.org/10.1016/j.oneear.2020.08.009>



- 694 Woo-Durand, C., Matte, J.-M., Cuddihy, G., McGourdji, C.L., Venter, O., Grant, J.W.A., 2020.  
695 Increasing importance of climate change and other threats to at-risk species in Canada.  
696 Environ. Rev. er-2020-0032. <https://doi.org/10.1139/er-2020-0032>
- 697 Woolmer, G., Trombulak, S.C., Ray, J.C., Doran, P.J., Anderson, M.G., Baldwin, R.F., Morgan,  
698 A., Sanderson, E.W., 2008. Rescaling the Human Footprint: A tool for conservation  
699 planning at an ecoregional scale. *Landsc. Urban Plan.* 87, 42–53.  
700 <https://doi.org/10.1016/j.landurbplan.2008.04.005>
- 701 WWF Canada, 2020. Living Planet Report Canada 2020 - Wildlife At Risk. WWF Canada,  
702 Toronto, On.
- 703 WWF Canada, 2003. The Nature Audit: Setting Canada’s Conservation Agenda for the 21st  
704 Century (No. 1). World Wildlife Fund Canada, Toronto, Canada.

## 705 **Table Captions**

706 Table 1: Road Pressure Scoring, separated by the different road types to allow for differential  
707 scoring. The distances represent the scores associated with each of the buffers.

708 Table 2: Rail Pressure Scoring, separated by operational and discontinued. The distances  
709 represent the scores associated with each of the buffers.

710 Table 3: Navigable Waterway Pressure Scoring. The distances represent the scores associated  
711 with each of the buffers.

712 Table 4: Mines Pressure Scoring, separated by the designated mining categories. The distances  
713 represent the scores associated with each of the buffers.

714 **Figure Captions**

715 Figure 1: Human footprint map of Canada showing the state of the system for COSEWIC  
716 national ecological areas. Pie chart sizes represent the approximate proportions each ecological  
717 area covers of Canada. The footprint represents 12 anthropogenic pressures: built environments,  
718 population density, nighttime lights, crop land, pasture land, roads, railways, navigable  
719 waterways, dams and associated reservoirs, mines, forestry and oil and gas.

720 Figure 2: Mean human footprint scores for each of the pressures included in the Canadian human  
721 footprint and the Global Human Footprint. ‘Canadian human footprint’ (white) are from the  
722 results produced in this project, the ‘Global, Canada’ (black) is from the global human footprint  
723 product clipped to Canada for comparison.

724 Figure 3: Visual comparison between the Canadian human footprint (first column) the high resolution  
725 satellite imagery (second column) and the Global human footprint (third column). The first row,  
726 Agricultural Area (a, b, c), is located in the prairies ecological area. The second row, Urban Area (d, e, f),  
727 shows the western part of the island of Montreal which is located in the Great Lakes Plains ecological  
728 area. The third row, Natural Resource Area (g, h, i), located in the Boreal ecological area, looks at a  
729 natural resource intensive area where forestry cutblocks and oil and gas infrastructure are present. The  
730 legend for column one is found in pane ‘d’ and for column three in pane ‘f’. The scale bar for each row is  
731 found in the second column. The source for first column is from this project, second column is from the  
732 high resolution imagery basemap option in ArcGIS and the third column from Venter et al. (2016a,  
733 2016b).

734 Figure 4: Results from the 4,746 x 1km<sup>2</sup> validation plots interpreted and scored following  
735 Supplementary Information, S1. (a) the visual interpretation score assigned and location for  
736 plots, and (b) the disagreement between the Canadian human footprint score and the visual  
737 interpreted score for validation normalized on a 0-1 scale.

Table 1: Road Pressure Scoring, separated by the different road types to allow for differential scoring. The distances represent the scores associated with each of the buffers.

|                                                         | 0-300m | 300-600m | 600-900m | 900-3000m |
|---------------------------------------------------------|--------|----------|----------|-----------|
| <b>Road Type</b>                                        |        |          |          |           |
| Trans-Canada Highway                                    | 10     | 8        | 6        | 4         |
| National Highway and Major Highways                     | 8      | 6        | 4        | 2         |
| Secondary Highways, Major streets and all other streets | 6      | 4        | 2        | 0         |

738

Table 2: Rail Pressure Scoring, separated by operational and discontinued. The distances represent the scores associated with each of the buffers.

|                  | 0-300m | 300-600m | 600-900m |
|------------------|--------|----------|----------|
| <b>Rail Type</b> |        |          |          |
| Operational      | 6      | 4        | 0        |
| Discontinued     | 6      | 4        | 1        |

Table 3: Navigable Waterway Pressure Scoring. The distances represent the scores associated with each of the buffers.

|                     | 0-300m | 300-600m | 600-900m |
|---------------------|--------|----------|----------|
| Navigable Waterways | 6      | 4        | 2        |

Table 4: Mines Pressure Scoring, separated by the designated mining categories. The distances represent the scores associated with each of the buffers.

|                     | 0-600m | 600-1500m | 1500-2400m | 2400-5100m | 5100-10000m |
|---------------------|--------|-----------|------------|------------|-------------|
| <b>Mine Type</b>    |        |           |            |            |             |
| Open pit (large)    | 8      | 8         | 4          | 2          | 1           |
| Open pit (small)    | 8      | 4         | 2          | 2          | 0           |
| Underground (large) | 6      | 6         | 4          | 2          | 1           |
| Underground (small) | 6      | 4         | 2          | 2          | 0           |

739

740

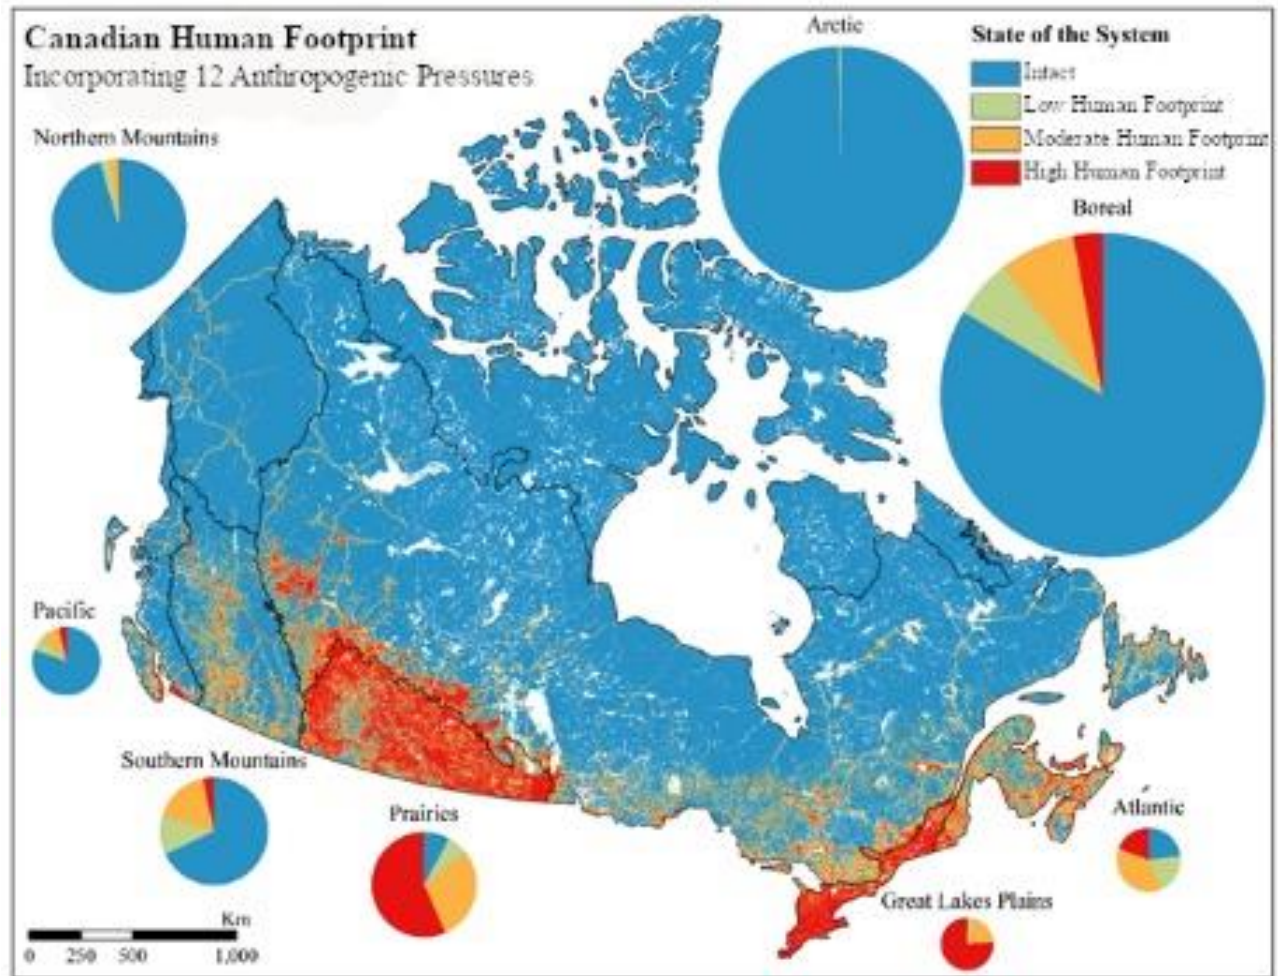

741

Figure 1: Human footprint map of Canada showing the state of the system for COSEWIC national ecological areas. Pie chart sizes represent the approximate proportions each ecological area covers of Canada. The footprint represents 12 anthropogenic pressures: built environments, population density, nighttime lights, crop land, pasture land, roads, railways, navigable waterways, dams and associated reservoirs, mines, forestry and oil and gas.

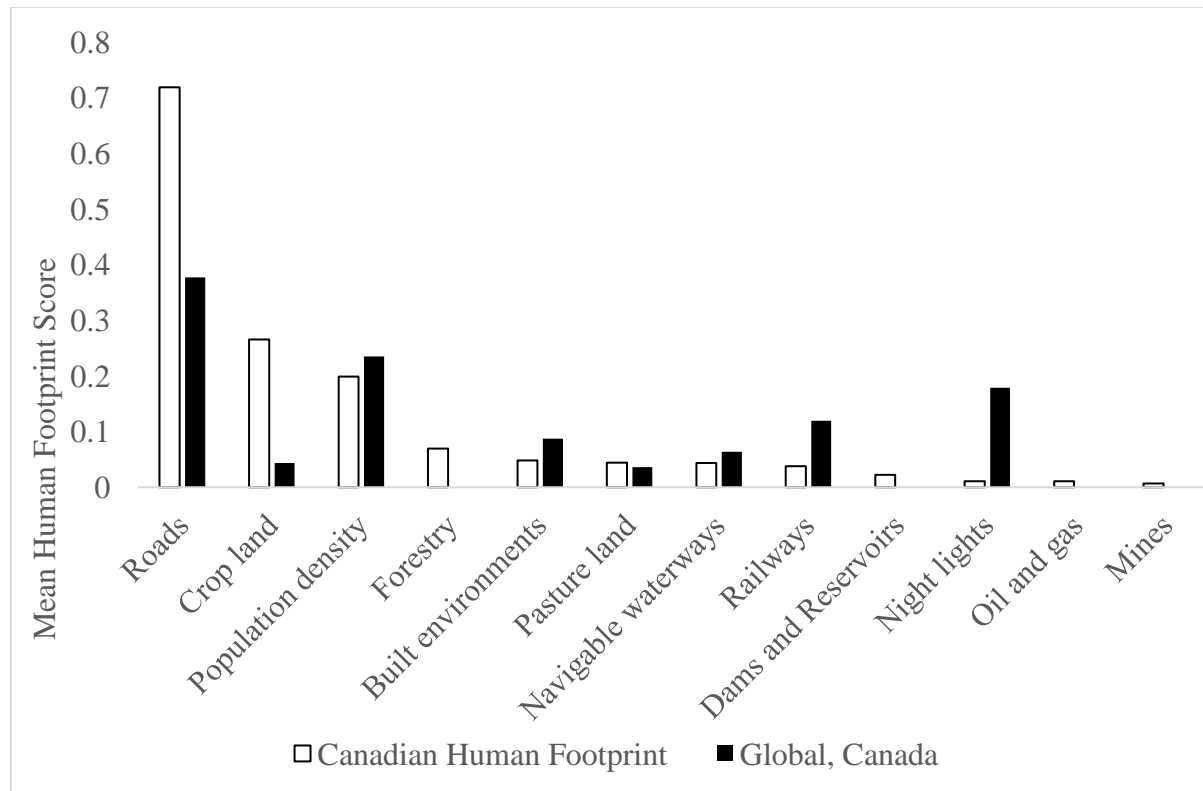

Figure 2: Mean human footprint scores for each of the pressures included in the Canadian human footprint and the Global Human Footprint. ‘Canadian human footprint’ (white) are from the results produced in this project, the ‘Global, Canada’ (black) is from the global human footprint product clipped to Canada for comparison.

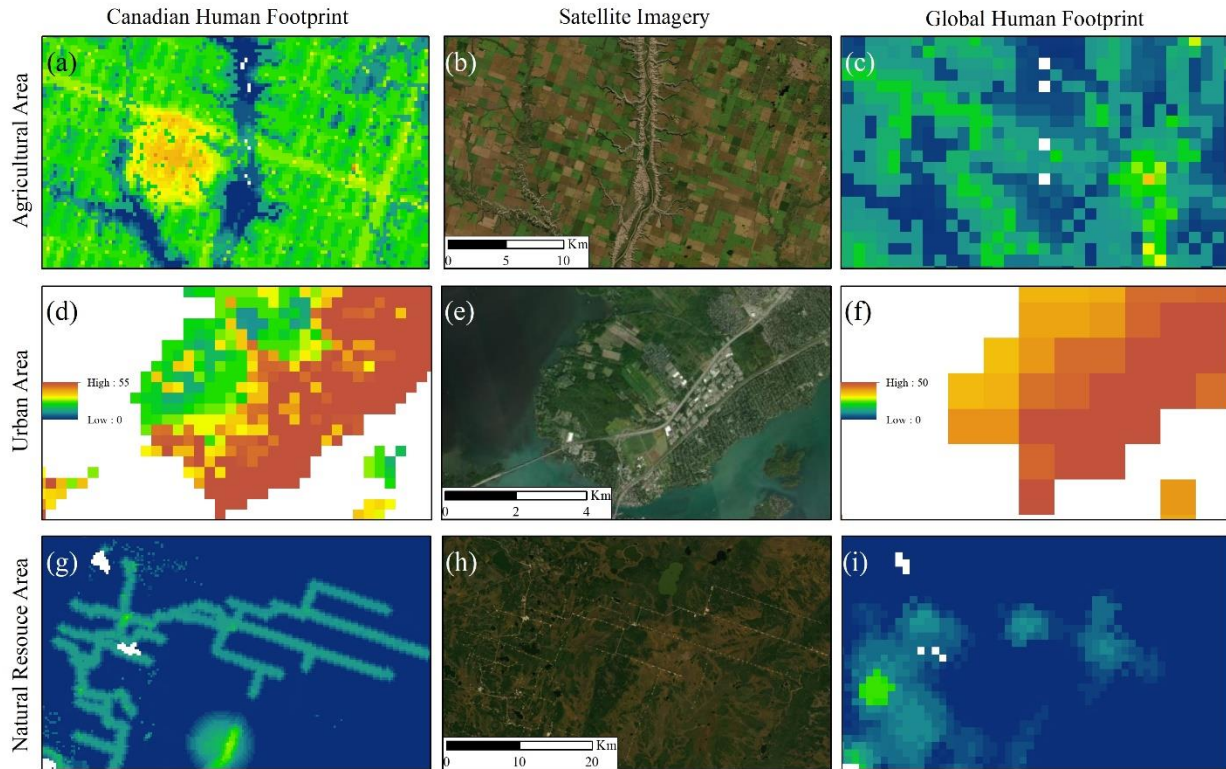

742

743 Figure 3: Visual comparison between the Canadian human footprint (first column) the high resolution  
744 satellite imagery (second column) and the Global human footprint (third column). The first row,  
745 Agricultural Area (a, b, c), is located in the prairies ecological area. The second row, Urban Area (d, e, f),  
746 shows the western part of the island of Montreal which is located in the Great Lakes Plains ecological  
747 area. The third row, Natural Resource Area (g, h, i), located in the Boreal ecological area, looks at a  
748 natural resource intensive area where forestry cutblocks and oil and gas infrastructure are present. The  
749 legend for column one is found in pane 'd' and for column three in pane 'f'. The scale bar for each row is  
750 found in the second column. The source for first column is from this project, second column is from the  
751 high resolution imagery basemap option in ArcGIS and the third column from Venter et al. (2016a,  
752 2016b).

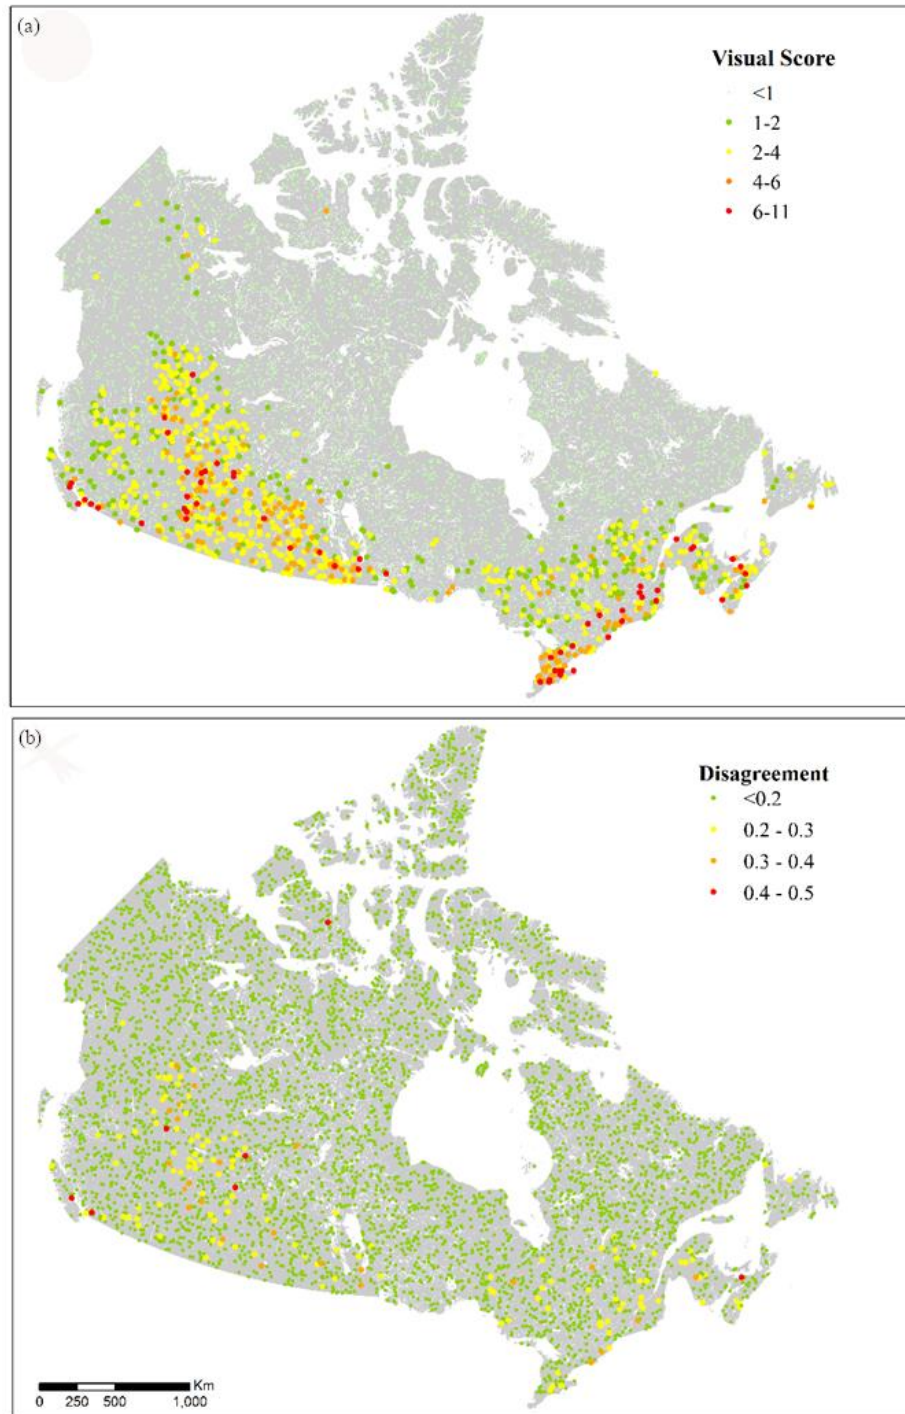

753

Figure 4: Results from the 4,746 x 1km<sup>2</sup> validation plots interpreted and scored following Supplementary Information, S1. (a) the visual interpretation score assigned and location for plots, and (b) the disagreement between the Canadian human footprint score and the visual interpreted score for validation normalized on a 0-1 scale.
